1 Title: Mendelian randomization study of diabetes and dementia in the Million Veteran Program

2  
3 Elizabeth M Litkowski (0000-0002-7079-696X),<sup>1,2,3</sup> Mark W Logue,<sup>4,5</sup> Rui Zhang,<sup>4</sup> Brian R Charest,<sup>6</sup> Ethan  
4 M Lange,<sup>2</sup> John E Hokanson,<sup>3</sup> Julie A Lynch,<sup>7,8</sup> Marijana Vujkovic,<sup>9,10</sup> Lawrence S Phillips,<sup>11,12</sup> Richard L  
5 Hauger,<sup>13,14</sup> \*Leslie A Lange,<sup>2,3</sup> \*Sridharan Raghavan,<sup>1,2</sup> on behalf of the VA Million Veteran Program  
6 (MVP)

7  
8 Corresponding Author: Elizabeth Litkowski  
9 e-mail: [elizabeth.litkowski@cuanschutz.edu](mailto:elizabeth.litkowski@cuanschutz.edu)

10 University of Colorado, School of Medicine  
11 Colorado Center for Personalized Medicine  
12 1890 N Revere Ct Mail Stop F563  
13 Aurora, CO 80045 USA  
14 303-588-9411

15  
16 Author Affiliations

17 <sup>1</sup>VA Eastern Colorado Healthcare System, Aurora, CO, 80045 USA

18 <sup>2</sup>Department of Biomedical Informatics, University of Colorado Anschutz Medical Campus, Aurora, CO,  
19 80045, USA

20 <sup>3</sup>Department of Epidemiology, University of Colorado Anschutz Medical Campus, Aurora, CO, 80045,  
21 USA

22 <sup>4</sup>National Center for PTSD, Behavioral Sciences Division, VA Boston Healthcare System, Boston, MA,  
23 02301, USA

24 <sup>5</sup>Boston University Schools of Medicine and Public Health, Boston, MA, 02118, USA

25 <sup>6</sup>VA Boston Healthcare System, Boston, MA, 02118, USA

26 <sup>7</sup>Salt Lake City VA, VA Informatics & Computing Infrastructure, Salt Lake City, UT, 84148, USA

27 <sup>8</sup>University of Utah, School of Medicine, Salt Lake City, UT, 84132, USA

28 <sup>9</sup>Corporal Michael J. Crescenz VA Medical Center, Philadelphia, PA, 19104, USA

29 <sup>10</sup>University of Pennsylvania, Philadelphia, PA, 19104, USA

30 <sup>11</sup>Atlanta VA Health Care System, Decatur, GA, 30033, USA

31 <sup>12</sup>Division of Endocrinology and Metabolism, Department of Medicine, Emory University School of  
32 Medicine, Atlanta, GA, 30307, USA

33 <sup>13</sup>Center of Excellence for Stress and Mental Health, VA San Diego Healthcare System, San Diego, CA,  
34 92161, USA

35 <sup>14</sup>Center for Behavior Genetics of Aging, School of Medicine, University of California, San Diego, La Jolla,  
36 CA, 92093, USA

37 \*Co-Senior Authors

38  
39 Abstract: 150 out of 150 words

40 Research in Context: 141 out of 150 words

41 Manuscript Word Count: 3231 out of 3500 words

42 Tables/Figures: 2 tables, 4 figures (out of 6)

43

44

45 **Structured Abstract**

46 INTRODUCTION: Diabetes and dementia are diseases of high healthcare burden worldwide. Individuals  
47 with diabetes have 1.4 to 2.2 times higher risk of dementia. Our objective was to evaluate evidence of  
48 causality between these two common diseases.

49 METHODS: We conducted a one-sample Mendelian randomization (MR) analysis in the U.S. Department  
50 of Veterans Affairs Million Veteran program. The study included 334,672 participants  $\geq 65$  years of age  
51 with type 2 diabetes and dementia case-control status and genotype data.

52 RESULTS: For each standard deviation increase in genetically-predicted diabetes, we found increased  
53 odds of three dementia diagnoses in non-Hispanic White participants (all-cause: OR=1.07[1.05-  
54 1.08],  $P=3.40E-18$ ; vascular: OR=1.11[1.07-1.15],  $P=3.63E-09$ , Alzheimer's: OR=1.06[1.02-1.09],  $P=6.84E-$   
55 04) and non-Hispanic Black participants (all-cause: OR=1.06[1.02-1.10],  $P=3.66E-03$ , vascular:  
56 OR=1.11[1.04-1.19],  $P=2.20E-03$ , Alzheimer's: OR=1.12 [1.02-1.23],  $P=1.60E-02$ ) but not in Hispanic  
57 participants (all  $P>.05$ ).

58  
59 DISCUSSION: We found evidence of causality between diabetes and dementia using a one-sample MR  
60 study, with access to individual level data, overcoming limitations of prior studies utilizing two-sample  
61 MR techniques.

62

63

64

65

66

67

68

69

70

71

72

73

74 **1.0 Background**

75 Diabetes and dementia each impose a high healthcare burden on the U.S. population. As of March 2020,  
76 the CDC estimated diabetes prevalence at 14.7%[1] of the adult U.S. population. Separately, a 2019  
77 study reported that 11.5% of adults at least 65 years of age had a diagnosis of Alzheimer’s disease (AD)  
78 or related dementias (ADRD), representing 1.6% of the U.S. population, a rate projected to double by  
79 2060.[2] Observational studies have demonstrated a clear association between diabetes and  
80 dementia.[3–7] Individuals with diabetes have a 1.4-2.2 greater relative risk of dementia than those  
81 without diabetes,[3,7] with the level of increased risk varying based on the specific dementia diagnosis  
82 evaluated.[8,9] Given the projection of 17.9% prevalence of diabetes in the U.S. by 2060,[10] it is critical  
83 to gain additional understanding regarding the relationship between diabetes and dementia. The  
84 uncertainty is whether the association is due to shared genetic susceptibility, pathophysiology that  
85 independently leads to these two common diseases, or if diabetes – which typically occurs at younger  
86 ages than dementia – triggers metabolic and/or neurological changes leading to dementia.[11–13] Our  
87 previous work in the Million Veteran Program (MVP) demonstrated that a genetic risk score (GRS) for  
88 type 2 diabetes (T2D) is associated with all-cause dementia and clinically diagnosed vascular dementia  
89 (VaD), and less strongly with clinically diagnosed AD.[14] Like prior observational studies, however, our  
90 study strictly assessed an association between T2D and all-cause, VaD, and/or AD without evaluating a  
91 causal relationship.

92  
93 Mendelian randomization (MR)[15] is an analysis approach that utilizes genetics to assess evidence of  
94 causality between an exposure and an outcome. In observational studies, it is difficult to establish  
95 causality because many environmental factors can influence both the exposure and outcome. The MR  
96 methodology was developed to mitigate these limitations by using genetic variation as an instrumental  
97 variable randomized at conception, therefore making the analysis less susceptible to environmental

98 confounders. Given the widespread availability of summary statistics from genome-wide association  
99 studies (GWAS), two sample techniques[16] have become popular options for conducting MR analysis.  
100 In two-sample MR studies, summary statistics from a GWAS of the exposure are analyzed against  
101 summary statistics from a GWAS of the outcome. These techniques are efficient but do not allow for  
102 sensitivity tests requiring individual-level data. Two-sample MR studies assessing the causal relationship  
103 of T2D and other glycemc traits with the risk of AD or reduced cognitive function have found little  
104 evidence that such a relationship exists.[5,17–20] However, the opportunity to apply similar methods to  
105 assess causal relationships with outcomes such as vascular dementia has been limited by the lack of  
106 published GWAS for this specific diagnosis.[5] One-sample MR is an alternative approach that can take  
107 advantage of individual level genotype, exposure, and outcome data in a single study, as long as the  
108 sample has enough power to conduct such analysis. Large clinical biobanks which have physician  
109 diagnoses and other clinical data are well-suited to this approach.

110

111 Our objective in this study was to conduct a one-sample MR analysis in MVP, the largest clinical biobank  
112 in the U.S., to evaluate if diabetes (our exposure) causes dementia (our outcome).

113

## 114 **2.0 Methods**

### 115 2.1 Population

116 We conducted our study in MVP,[21] a biobank linking clinical data from the Veterans Affairs Healthcare  
117 System (VA) with genotype data on over 650,000 racially/ethnically diverse individuals.[22] The VA  
118 Central Institutional Review Board provided approval for the study protocol in accordance with the  
119 principles of the Declaration of Helsinki.[23] We analyzed MVP participants who were  $\geq 65$  years of age  
120 at the time of the release of their genotype data, stratified by harmonized ancestry and race/ethnicity  
121 classifications (HARE)[24] of Non-Hispanic White (EUR), Non-Hispanic Black (AFR), and Hispanic (HIS).

122 HARE classifications are determined through a self-report of race/ethnicity validated with genetic data.

123

## 124 2.2 Exposure: Instruments Using Genotype Data

125 We utilized the study sample (N = 334,672) of participants with a coefficient of kinship  $\leq 0.088$ , whose

126 imputed genotype data was sourced from Release 4 of MVP 1.0 as previously described.[14,25] Our

127 instruments were 331 variants demonstrated to be statistically significant in a T2D genome wide

128 association analysis from the Diabetes Meta-analysis of Trans-ethnic Association Studies (DIAMANTE)

129 Consortium[26] with European effect sizes from Mahajan et al., 2018[27] used in our previous work.[14]

130 We chose not to use a more recent GWAS of type 2 diabetes[23] to avoid overfitting, as detailed in our

131 previous paper.[14] The variants were not in linkage disequilibrium ( $R^2 \leq 0.5$ ),[26] and for our initial

132 steps, we retained the rs429358 variant known to be associated with both diabetes and dementia.[14]

## 133 2.3 Outcome: Case-Control Definitions of Dementia

134 Our outcomes were three clinical diagnoses of dementia (Figure S1 in the Supplement): all-cause

135 dementia, vascular dementia (VaD), and Alzheimer's Disease (AD), based on International Classification

136 of Diseases 9<sup>th</sup> (ICD9) or 10<sup>th</sup> (ICD10) Revision[28] diagnosis codes (Table S1 in the Supplement). In the

137 VA electronic health record, these codes are logged by presiding physicians during routine clinical care.

138 A case was defined as a participant with at least two ICD 9 or 10 codes corresponding to one or more

139 outcomes, as defined by the grouping in Table S1. Note that individuals meeting the case definition of

140 AD and VaD were included as cases for both – that is, AD and VaD were not mutually exclusive. Controls

141 were those participants without a single dementia ICD code in VA clinical records.

## 142 2.4 Statistical Analysis

143 We compared individuals with and without prevalent T2D using chi-square tests for categorical variables

144 and t-tests for continuous variables. Prevalent T2D cases were defined as individuals whose first

145 diagnosis occurred prior to MVP enrollment. We used MR[15] analysis to evaluate evidence of causality

146 between T2D and clinical diagnoses of dementia. The use of MR requires that three assumptions are  
147 satisfied (Figure 1): A. The genetic variants must serve as strong instruments for the exposure  
148 (relevance); B. the instrumental variable (IV) must be related to the outcome only through the exposure  
149 (exclusion restriction, i.e., no pleiotropy); and C. the IV must not be associated with any confounders  
150 between the exposure and outcome (exchangeability).

## 151 2.5 Two Stage Least Squares Method

152 We used a two stage least squares (2SLS) MR[29] approach to estimate the causal associations between  
153 T2D and three clinical diagnoses of dementia. The 2SLS method employs two regression equations

$$\text{Stage 1: } x_1 = \gamma_1 + \pi_1 G_1 + v_1$$

$$\text{Stage 2: } y = \alpha + \beta_1 \hat{x}_1 + u$$

154 where stage 1 evaluates the genetic risk with the exposure and stage 2 estimates the prediction of the  
155 exposure with the outcome. For our genetic risk, we regressed a standardized weighted score of valid  
156 genetic instruments and effect sizes from published GWAS[30] against the log odds of T2D in  
157 the MVP biobank, adjusting for 10 genetic principal components. In stage 2, we evaluated the  
158 association of the standardized genetically predicted probability of T2D (referred to as ‘genetically  
159 predicted T2D risk’ going forward) from stage 1 with our three outcomes of dementia using logistic  
160 regression adjusting for age, and self-reported biological sex. To account for the uncertainty inherent in  
161 the first stage of the analysis, we utilized the ‘ivtools’ methodology introduced in Sjölander and  
162 Martinussen[31] to provide estimates for nonlinear models. In more precise terms, we specified the ‘ts’  
163 estimation method in the R function ‘ivglm’ supplying the regression model output from the two stages  
164 and reported the estimates resulting from this function. The beta coefficient estimates can be  
165 interpreted as the log odds of dementia per standard deviation increase in genetically predicted T2D

166 risk. All models were stratified by EUR, AFR, and HIS, with a significance threshold of 0.017 (0.05/3) to  
167 account for multiple testing.

168

## 169 2.6 Quartiles of Genetic Risk

170 To evaluate the impact of increasing genetic risk of diabetes on the three dementia diagnoses, we also  
171 assessed the difference in the odds of dementia by quartiles of diabetes genetic risk. That is, we divided  
172 the genetically predicted T2D risk from the first stage of our analysis into quartiles and evaluated the top  
173 three quartiles of risk against the reference quartile, the one with the lowest genetic risk of T2D. In this  
174 evaluation, the quartile was treated as a factor input to the second stage of the model and again, we  
175 used the ‘ivglm’ method to account for uncertainty in the first stage. Additionally, we assessed potential  
176 trends in the quartiles of progressive genetic risk using a Cochran Armitage trend test.[32,33]

177

## 178 2.7 Summarized Data and Pleiotropy Assessment

179 We also assessed the causal association using MR methods built to analyze effects when conducting  
180 two-sample MR. We calculated estimates using the inverse-weighted (IVW), median, and MR Egger[15]  
181 methods recommended as part of the MendelianRandomization[34] R package (v0.3.0). These methods  
182 provide effect estimates and standard errors based on summary measures of the relationship with the  
183 exposure versus the relationship with the outcome. The methods also assess evidence of pleiotropy.

184 We additionally used MR-PRESSO[35] to test for outliers in the list of valid genetic instruments (R  
185 package version 1.0).[35] Details of these methods can be found in the Supplement (Methods S1).

186

## 187 2.8 Addressing Mendelian Randomization Assumptions

188 We used linear regression to evaluate the weighted instrument association strength with diabetes status  
189 by race/ethnicity population to test assumption A. An F-statistic in the linear relationship between the  
190 instrument and the exposure  $>10$  is conventionally accepted as an indicator of a strong instrument[36].  
191 To evaluate pleiotropy (assumption B), we used the MR-Egger method from the  
192 MendelianRandomization[15,37,38] package in R. MR-Egger constructs the best fit line in the  
193 relationship between the exposure effects and outcome effects. Pleiotropy is concluded to occur if the  
194 intercept of the slope of this relationship differs from zero. We also used MR\_PRESSO[35] to check for  
195 pleiotropy. MR\_PRESSO uses a leave-one out strategy to test for the impact of any single variant being  
196 considered as an instrument. If we found that any variants violated the no pleiotropy assumption, we  
197 removed those variants from the list of valid instruments for this analysis. To address assumption C, we  
198 used the recommendation by Vanderweele, et. al., [39,40] to calculate E-Values. An E-Value puts a  
199 boundary on the potential bias introduced by unmeasured confounders. The E-Value is the effect size of  
200 an unmeasured confounder, with both the exposure and the outcome, required to explain away the  
201 exposure-outcome effect.

## 202 **3.0 Results**

203 We had 82,980 participants with a T2D diagnosis and 251,692 without for a sample size of 334,672 that  
204 met our study inclusion criteria (Table 1). Compared to those without T2D, those with T2D were younger  
205 (74.0 versus 74.7 years), less likely to be female (2.5% versus 3.2%), and more likely to be AFR (17.4%  
206 versus 11.4%) or HIS (7.5% versus 4.7%). All-cause dementia and VaD cases were more prevalent in  
207 those with T2D than in those without: 8.7% vs 6.7%, and 2.0% vs 1.0%, respectively. Prevalence of AD  
208 was similar between those with/without T2D (1.4% vs 1.3%).

209

### 210 **3.1 Two Stage Least Squares Results**



211 From the 331 initial variants, we identified 330 that met our criteria for valid instruments. For the  
212 remainder of our discussion, we will call the standardized weighted combination of these variants  
213 ‘GRS330’. In stage 1 of the 2SLS model, the odds of diabetes were significantly associated with GRS330  
214 for all three HARE groups (OR of T2D per standard deviation increase in GRS330 in EUR: 1.50,  $P=4.6e-$   
215  $308$ ; AFR: 1.28,  $P=5.2e-125$ ; HIS: 1.46,  $P=3.2e-118$ ). The standardized predicted probability of T2D risk  
216 from stage 1 (we will call this value ‘GRS330\_Predicted’) was calculated for each individual and the  
217 distribution of this value differed by T2D status (Figure 2).

218 GRS330\_Predicted was associated with all dementia diagnoses (Table 2) in EUR. For each standard  
219 deviation increase in GRS330\_Predicted, the odds of all-cause dementia increased by 1.07 (95% CI: 1.05-  
220 1.08,  $P=3.40E-18$ ). We found similar results for VaD (OR=1.11, 95% CI: 1.07-1.15,  $P=3.63E-09$ ) and AD  
221 (OR=1.06, 95% CI: 1.02-1.09,  $P=6.84E-04$ ). In AFR, GRS\_Predicted was associated (Table 2) with all-cause  
222 dementia (OR=1.06, 95% CI: 1.02-1.10,  $P=3.66E-03$ ), VaD (OR=1.11, 95% CI: 1.04-1.19,  $P=2.20E-03$ ) and  
223 AD (OR = 1.12, 95%CI: 1.02-1.23,  $P=1.60E-02$ ). For HIS, there were no statistically significant associations  
224 (Table 2) between GRS330\_Predicted and any dementia diagnosis (all  $P>.05$ ).

225

### 226 3.2 Quartile Analysis Results

227 To demonstrate the impact of higher genetic liability for type 2 diabetes, we have also shown the risk of  
228 dementia diagnosis by quartile of GRS330\_Predicted (Figure 3). In EUR, the 4<sup>th</sup> quartile of  
229 GRS330\_Predicted increased the odds of all dementia diagnoses as compared to the 1<sup>st</sup> quartile (Figure  
230 3a): all-cause dementia (OR=1.18, 95% CI: 1.14-1.24,  $P=3.82E-15$ ), VaD (OR=1.33, 95% CI: 1.20-1.47,  
231  $P=3.08E-08$ ), and AD (OR=1.14, 95% CI: 1.03-1.25,  $P=8.13E-03$ ). We observed similar results for the  
232 comparison of the 4<sup>th</sup> quartile of genetically-predicted T2D risk to the 1<sup>st</sup> in AFR (Figure 3b) for all-cause-  
233 dementia (OR=1.18, 95% CI: 1.06-1.32,  $P=3.33E-03$ ) and VaD (OR=1.42, 95% CI: 1.16-1.74,  $P=6.63E-03$ ),

234 but not for AD ( $P=.07$ ). In HIS, none of the quartile associations with dementia diagnoses were  
235 statistically significant (all  $P>.18$ ).

236  
237 The Cochran-Armitage[32,41] test (Table S2) for the trend in the relationship between  
238 GRS330\_Predicted quartiles and dementia diagnoses was significant for all-cause dementia ( $P=3.6e-05$ )  
239 and VaD ( $P=3.6e-05$ ) but not AD ( $P=.82$ ) in EUR. The trend tests for GRS330\_Predicted quartiles and  
240 dementia were not significant for any diagnosis in AFR (all  $P>.05$ ) or in HIS.

241  
242 3.3 Summarized Data Results  
243 When utilizing the two sample MR approaches, we used the weighted combination of the instruments,  
244 GRS330, for the exposure. All methods for assessing the association between GRS330 and all-cause  
245 dementia in EUR provided consistent directions of effect with the primary 2SLS analyses and significant  
246 associations (Figure 4a, Table S3 in the Supplement). The results for AFR (Figure 4b) and HIS (Figure 4c)  
247 were directionally consistent with those of EUR except for the MR Egger approach in AFR (Figure 4b),  
248 though the associations were not always statistically significant (Table S3 in the Supplement). Similarly,  
249 the two sample methods provided consistent results with the primary one-sample analysis for the  
250 dementia subtypes, though not always achieving statistical significance (See Results S1 in the  
251 Supplement for full details).

252  
253 3.4 Assessment of Mendelian Randomization Assumptions  
254 Assumption A. Strong Instrument (relevance): The combination of the final 330 valid instruments  
255 (GRS330) demonstrated a significant association with diabetes. The F-statistics in the linear associations  
256 between the instruments and diabetes were 61.8 for HIS, 57.3 for AFR, and 740.4 for EUR.

257 Assumption B. Pleiotropy (exclusion restriction): The MR Egger test with GRS330 did not exhibit  
258 pleiotropy ( $P > 0.05$ , Table S4 in the Supplement). As expected, however, when additionally including the  
259 rs429358 variant known to be associated with both T2D and dementia, heterogeneity was detected  
260 (Table S4 in the Supplement, all  $P < .017$ ) except in the case of HIS with VaD. This heterogeneity was  
261 attenuated when removing rs429358 from the test (all  $P > .01$ ). The MR\_PRESSO test (Table S5 in the  
262 Supplement) characterized rs429358 as an outlier in the relationship between the exposure effect and  
263 outcome effect for all HARE groups and all clinical dementia diagnoses except HIS with VaD. Given the  
264 results of the pleiotropy and heterogeneity assessment, we excluded rs429358 and used GRS330 as our  
265 valid instrument.

266 Assumption C. Unmeasured Confounders (exchangeability): The sensitivity E-Value calculations were  
267 based on our previous work[14] in which we calculated odds ratios for the association of GRS330 with  
268 each clinical diagnosis of dementia stratified by HARE group. We used the risk ratio formula  
269 recommended by VanderWeele and Ding[40] for the scenario in which disease prevalence is less than  
270 15%. As the odds ratios ranged from 1.02 to 1.15, the E-Value ranged from 1.16 to 1.57 with the E-Value  
271 of the lower bound of the 95% confidence interval ranging from 1.0 to 1.4. (Table S6 in the Supplement).

## 272 **4.0 Discussion**

273 We found evidence of causality between T2D and all-cause dementia as well as clinically diagnosed VaD  
274 in EUR, with similar results in AFR. The effect estimates in HIS were similar to EUR and AFR but without  
275 statistical significance. The relationship between T2D and clinically diagnosed AD had a reduced effect  
276 estimate in EUR in comparison to all-cause dementia but an increased effect estimate in AFR, indicating  
277 a need for further research to elucidate the differences by HARE group.

278

279 Given the wealth of observational data linking T2D and dementia, researchers have hypothesized a  
280 causal relationship between the two but have found little evidence to support such a conclusion. In

281 work focused on AD as an endpoint, several studies found no evidence of a relationship with genetically  
282 predicted T2D risk: a Danish study by Thomassen et. al.,[5] the International Genomics of Alzheimer’s  
283 Project by Østergaard et. al.,[18] the Health and Retirement Study (HRS) by Walter et al.,[17] and  
284 DIAbetes Genetics Replication And Meta-analysis (DIAGRAM) and Meta-Analyses of Glucose and Insulin-  
285 related traits Consortium (MAGIC) by Pan et. al.[42] When focused on general cognitive impairment as  
286 the outcome, Ware et. al.[20] (HRS) and Garfield[19] (UK Biobank) had similar results. These results  
287 could be explained by the lack of broad genetics studies for other dementia diagnoses such as vascular  
288 dementia, as noted by Thomassen et.al.,[5]. Our study, which did identify evidence of causality, was able  
289 to assess multiple diagnoses of dementia using recently reported T2D genome-wide significant variants.

290  
291 While the previous studies linking the broad spectrum of T2D with AD did not report evidence  
292 supporting causality, studies deciphering mechanisms related to diabetes have been able to offer  
293 further insight. Walter et. al.,[17] discovered that genetically-predicted insulin sensitivity was causally  
294 associated with AD in HRS. In a like manner, Pan et. al.,[42] detected a causal relationship when  
295 assessing genetic instruments for higher fasting glucose and lower HOMA- $\beta$ -cell function with AD using a  
296 two-sample MR approach across the DIAGRAM and MAGIC consortia. Tschritter et al.,[12] demonstrated  
297 a cortical activity response difference to insulin infusion between carriers and non-carriers of the 972Arg  
298 variant of the *IRS-1* gene known to be associated with type 2 diabetes[43], as well as a similar response  
299 difference between lean (insulin-sensitive) and obese (insulin-resistant) individuals. These studies  
300 suggest future research directions that delve into the potential metabolic pathways through which  
301 diabetes might lead to dementia.

302  
303 Previous studies assessing the relationship between T2D and AD were focused on populations with  
304 European ancestry. The MVP biobank is well powered to assess associations in an African American

305 population. In particular, we discovered evidence of causality between T2D and clinically diagnosed VaD  
306 in AFR to have a similar magnitude of effect to EUR even though the sample size was smaller. The  
307 higher effect sizes for clinically diagnosed AD (Table 2) and the outlier effect observed with all-cause  
308 dementia (Figure 4b) in this population suggest an area for focused follow-up in future research.

309  
310 We had several limitations in our study. The small number of female participants does not allow an  
311 assessment of distinctive results by biological sex. Given the small proportion of females, our results are  
312 largely driven by male participants, and so cannot be generalized to both sexes. Our outcomes were  
313 determined based on a physician's diagnosis which may cause some amount of imprecision. Our T2D  
314 weighting structure was based on a previous study of European ancestry that might overlook important  
315 genetic architecture specific to the African American and Hispanic populations.

316  
317 Despite these limitations, we conclude from our one-sample MR study in a large US biobank that there is  
318 evidence of a causal association of diabetes with dementia. Moreover, the difference in the strength of  
319 effect in the association of vascular dementia versus AD in the European population is suggestive of  
320 different mechanisms. The strength of association for both vascular dementia and AD in the African  
321 population requires further investigation. Establishing a causal association represents a first step  
322 toward examining the potential impact of the expanding prevalence of diabetes on dementia incidence  
323 and whether diabetes prevention and/or treatment can mitigate dementia risk.

324

## 325 References

- 326 1. Prevalence of Both Diagnosed and Undiagnosed Diabetes | Diabetes | CDC [Internet]. 2020 [cited  
327 2020 Oct 13]. Available from: [https://www.cdc.gov/diabetes/data/statistics-report/diagnosed-](https://www.cdc.gov/diabetes/data/statistics-report/diagnosed-undiagnosed-diabetes.html)  
328 [undiagnosed-diabetes.html](https://www.cdc.gov/diabetes/data/statistics-report/diagnosed-undiagnosed-diabetes.html)
- 329 2. Matthews KA, Xu W, Gaglioti AH, Holt JB, Croft JB, Mack D, et al. Racial and ethnic estimates of  
330 Alzheimer's disease and related dementias in the United States (2015–2060) in adults aged ≥65  
331 years. *Alzheimers Dement J Alzheimers Assoc.* 2019 Jan;15(1):17–24.
- 332 3. Biessels GJ, Staekenborg S, Brunner E, Brayne C, Scheltens P. Risk of dementia in diabetes mellitus:  
333 a systematic review. *Lancet Neurol.* 2006 Jan;5(1):64–74.
- 334 4. Xue M, Xu W, Ou YN, Cao XP, Tan MS, Tan L, et al. Diabetes mellitus and risks of cognitive  
335 impairment and dementia: A systematic review and meta-analysis of 144 prospective studies.  
336 *Ageing Res Rev.* 2019 Nov;55:100944.
- 337 5. Thomassen JQ, Tolstrup JS, Benn M, Frikke-Schmidt R. Type-2 diabetes and risk of dementia:  
338 observational and Mendelian randomisation studies in 1 million individuals. *Epidemiol Psychiatr*  
339 *Sci.* 2020 Apr 24;29:e118.
- 340 6. Exalto LG, Biessels GJ, Karter AJ, Huang ES, Katon WJ, Minkoff JR, et al. Risk score for prediction of  
341 10 year dementia risk in individuals with type 2 diabetes: a cohort study. *Lancet Diabetes*  
342 *Endocrinol.* 2013 Nov;1(3):183–90.
- 343 7. Luchsinger JA. Diabetes, related conditions, and dementia. *J Neurol Sci.* 2010 Dec 15;299(1–2):35–  
344 8.
- 345 8. Hadley G, Zhang J, Harris-Skillman E, Alexopoulou Z, DeLuca GC, Pendlebury ST. Cognitive decline  
346 and diabetes: a systematic review of the neuropathological correlates accounting for cognition at  
347 death. *J Neurol Neurosurg Psychiatry.* 2022 Mar;93(3):246–53.
- 348 9. Biessels GJ, Despa F. Cognitive decline and dementia in diabetes: mechanisms and clinical  
349 implications. *Nat Rev Endocrinol.* 2018 Oct;14(10):591–604.
- 350 10. Lin J, Thompson TJ, Cheng YJ, Zhuo X, Zhang P, Gregg E, et al. Projection of the future diabetes  
351 burden in the United States through 2060. *Popul Health Metr.* 2018 Jun 15;16(1):9.
- 352 11. Bello-Chavolla OY, Antonio-Villa NE, Vargas-Vázquez A, Ávila-Funes JA, Aguilar-Salinas CA.  
353 Pathophysiological Mechanisms Linking Type 2 Diabetes and Dementia: Review of Evidence from  
354 Clinical, Translational and Epidemiological Research. *Curr Diabetes Rev.* 2019;15(6):456–70.
- 355 12. Tschritter O, Preissl H, Hennige AM, Stumvoll M, Porubská K, Frost R, et al. The cerebrocortical  
356 response to hyperinsulinemia is reduced in overweight humans: a magnetoencephalographic  
357 study. *Proc Natl Acad Sci U S A.* 2006 Aug 8;103(32):12103–8.
- 358 13. Yoo DY, Yim HS, Jung HY, Nam SM, Kim JW, Choi JH, et al. Chronic type 2 diabetes reduces the  
359 integrity of the blood-brain barrier by reducing tight junction proteins in the hippocampus. *J Vet*  
360 *Med Sci.* 2016 Jul 1;78(6):957–62.

- 361 14. Litkowski EM, Logue MW, Zhang R, Charest BR, Lange EM, Hokanson JE, et al. A Diabetes Genetic  
362 Risk Score Is Associated With All-Cause Dementia and Clinically Diagnosed Vascular Dementia in  
363 the Million Veteran Program. *Diabetes Care*. 2022 Aug 30;dc220105.
- 364 15. Bowden J, Davey Smith G, Burgess S. Mendelian randomization with invalid instruments: effect  
365 estimation and bias detection through Egger regression. *Int J Epidemiol*. 2015 Apr;44(2):512–25.
- 366 16. Burgess S, Scott RA, Timpson NJ, Davey Smith G, Thompson SG, EPIC- InterAct Consortium. Using  
367 published data in Mendelian randomization: a blueprint for efficient identification of causal risk  
368 factors. *Eur J Epidemiol*. 2015 Jul;30(7):543–52.
- 369 17. Walter S, Marden JR, Kubzansky LD, Mayeda ER, Crane PK, Chang SC, et al. Diabetic Phenotypes  
370 and Late-Life Dementia Risk: A Mechanism-specific Mendelian Randomization Study. *Alzheimer Dis  
371 Assoc Disord*. 2016 Mar;30(1):15–20.
- 372 18. Østergaard SD, Mukherjee S, Sharp SJ, Proitsi P, Lotta LA, Day F, et al. Associations between  
373 Potentially Modifiable Risk Factors and Alzheimer Disease: A Mendelian Randomization Study.  
374 *PLoS Med*. 2015 Jun;12(6):e1001841; discussion e1001841.
- 375 19. Garfield V, Farmaki AE, Fatemifar G, Eastwood SV, Mathur R, Rentsch CT, et al. Relationship  
376 Between Glycemia and Cognitive Function, Structural Brain Outcomes, and Dementia: A Mendelian  
377 Randomization Study in the UK Biobank. *Diabetes*. 2021 Oct 1;70(10):2313–21.
- 378 20. Ware EB, Morataya C, Fu M, Bakulski KM. Type 2 Diabetes and Cognitive Status in the Health and  
379 Retirement Study: A Mendelian Randomization Approach. *Front Genet*. 2021;12:634767.
- 380 21. Gaziano JM, Concato J, Brophy M, Fiore L, Pyarajan S, Breeling J, et al. Million Veteran Program: A  
381 mega-biobank to study genetic influences on health and disease. *J Clin Epidemiol*. 2016  
382 Feb;70:214–23.
- 383 22. Million Veteran Program (MVP) [Internet]. [cited 2020 Jun 11]. Available from:  
384 <https://www.research.va.gov/mvp/>
- 385 23. Vujkovic M, Keaton JM, Lynch JA, Miller DR, Zhou J, Tcheandjieu C, et al. Discovery of 318 new risk  
386 loci for type 2 diabetes and related vascular outcomes among 1.4 million participants in a multi-  
387 ancestry meta-analysis. *Nat Genet*. 2020 Jun 15;
- 388 24. Fang H, Hui Q, Lynch J, Honerlaw J, Assimes TL, Huang J, et al. Harmonizing Genetic Ancestry and  
389 Self-identified Race/Ethnicity in Genome-wide Association Studies. *Am J Hum Genet*. 2019  
390 03;105(4):763–72.
- 391 25. Hunter-Zinck H, Shi Y, Li M, Gorman BR, Ji SG, Sun N, et al. Genotyping Array Design and Data  
392 Quality Control in the Million Veteran Program. *Am J Hum Genet*. 2020 Apr 2;106(4):535–48.
- 393 26. Mahajan A, Spracklen CN, Zhang W, Ng MCY, Petty LE, Kitajima H, et al. Multi-ancestry genetic  
394 study of type 2 diabetes highlights the power of diverse populations for discovery and translation.  
395 *Nat Genet*. 2022 May;54(5):560–72.

- 396 27. Mahajan A, Taliun D, Thurner M, Robertson NR, Torres JM, Rayner NW, et al. Fine-mapping type 2  
397 diabetes loci to single-variant resolution using high-density imputation and islet-specific  
398 epigenome maps. *Nat Genet.* 2018;50(11):1505–13.
- 399 28. International Classification of Diseases (ICD) [Internet]. [cited 2021 Dec 13]. Available from:  
400 <https://www.who.int/standards/classifications/classification-of-diseases>
- 401 29. Sanderson E, Davey Smith G, Windmeijer F, Bowden J. An examination of multivariable Mendelian  
402 randomization in the single-sample and two-sample summary data settings. *Int J Epidemiol.* 2019  
403 Jun 1;48(3):713–27.
- 404 30. Mahajan A, Taliun D, Thurner M, Robertson NR, Torres JM, Rayner NW, et al. Fine-mapping type 2  
405 diabetes loci to single-variant resolution using high-density imputation and islet-specific  
406 epigenome maps. *Nat Genet.* 2018 Nov;50(11):1505–13.
- 407 31. Sjolander A, Martinussen T. Instrumental Variable Estimation with the R Package ivtools. *Epidemiol  
408 Methods* [Internet]. 2019 Dec 1 [cited 2023 Feb 7];8(1). Available from:  
409 <https://www.degruyter.com/document/doi/10.1515/em-2018-0024/html?lang=en>
- 410 32. Cochran WG. Some Methods for Strengthening the Common  $\chi^2$  Tests. *Biometrics.* 1954;10(4):417–  
411 51.
- 412 33. McKenzie JE, Salanti G, Lewis SC, Altman DG. Meta-analysis and The Cochrane Collaboration: 20  
413 years of the Cochrane Statistical Methods Group. *Syst Rev.* 2013 Nov 26;2:80.
- 414 34. Bowden J, Davey Smith G, Haycock PC, Burgess S. Consistent Estimation in Mendelian  
415 Randomization with Some Invalid Instruments Using a Weighted Median Estimator. *Genet  
416 Epidemiol.* 2016 May;40(4):304–14.
- 417 35. Verbanck M, Chen CY, Neale B, Do R. Detection of widespread horizontal pleiotropy in causal  
418 relationships inferred from Mendelian randomization between complex traits and diseases. *Nat  
419 Genet.* 2018 May;50(5):693–8.
- 420 36. Staiger D, Stock JH. Instrumental Variables Regression with Weak Instruments. *Econometrica.*  
421 1997;65(3):557–86.
- 422 37. Burgess S, Small DS, Thompson SG. A review of instrumental variable estimators for Mendelian  
423 randomization. *Stat Methods Med Res.* 2017 Oct;26(5):2333–55.
- 424 38. Burgess S, Thompson SG. Interpreting findings from Mendelian randomization using the MR-Egger  
425 method. *Eur J Epidemiol.* 2017;32(5):377–89.
- 426 39. Swanson SA, VanderWeele TJ. E-Values for Mendelian Randomization. *Epidemiology.* 2020  
427 May;31(3):e23–4.
- 428 40. VanderWeele TJ, Ding P. Sensitivity Analysis in Observational Research: Introducing the E-Value.  
429 *Ann Intern Med.* 2017 Aug 15;167(4):268.



- 430 41. Armitage P. Tests for Linear Trends in Proportions and Frequencies. *Biometrics*. 1955;11(3):375–  
431 86.
- 432 42. Pan Y, Chen W, Yan H, Wang M, Xiang X. Glycemic traits and Alzheimer’s disease: a Mendelian  
433 randomization study. *Aging*. 2020 Nov 16;12(22):22688–99.
- 434 43. Jellema A, Zeegers MPA, Feskens EJM, Dagnelie PC, Mensink RP. Gly972Arg variant in the insulin  
435 receptor substrate-1 gene and association with Type 2 diabetes: a meta-analysis of 27 studies.  
436 *Diabetologia*. 2003 Jul;46(7):990–5.

437

### 438 **Figure Legends**

439 Figure 1. Mendelian Randomization Assumptions: The required assumptions to ensure the validity of the  
440 Mendelian Randomization Analysis Approach

441

442 Figure 2. Predicted Probability: Distribution of the standardized predicted probability of GRS330  
443 (excluding the rs429358 variant) in those with and without diabetes stratified by race/ethnicity  
444 classification.

445

446 Figure 3. Risk Quartiles: Quartiles, listed in parentheses, of genetically predicted risk of diabetes  
447 (GRS330\_Predicted) associated with increased risk of dementia diagnosis for all-cause dementia  
448 (orange), clinically diagnosed VaD (blue) and clinically diagnosed AD (green) in a) EUR: European  
449 population, b) AFR: African population, c) HIS: Hispanic population

450 Figure 4. Mendelian Randomization Methods: Methods using the Mendelian Randomization package are  
451 shown here. Simple estimates have no weighting and weighted estimates use standard errors for  
452 weighting factors. a) Associations between GRS330 and all-cause dementia in EUR, b) Associations  
453 between GRS330 and all-cause dementia in AFR, and c) Associations between GRS330 and all-cause  
454 dementia in HIS.

## 455 Acknowledgements

456 Author Contributions: EML designed the study, performed the literature review, conducted the analysis,  
457 and wrote the manuscript. MWL contributed to the dementia phenotype definitions and edited the  
458 manuscript. RZ implemented the dementia phenotypes. BRC implemented the diabetes phenotype.  
459 EML(2) provided guidance on statistical methods and edited the document. JEH provided guidance on  
460 applicable epidemiology concepts and study design. JAL designed the dementia phenotype groupings.  
461 MV provided epidemiology advice on the MR study design. LSP designed the diabetes complications  
462 study. LAL provided epidemiology, study structure and writing guidance. RLH provided dementia subject  
463 matter expertise. SR offered diabetes subject matter expertise, study design and analysis guidance, and  
464 edited the manuscript. EML and SR are the guarantors of this work and, as such, had full access to all the  
465 data in this study and take responsibility for the integrity of the data and accuracy of the data analysis.  
466 The corresponding author attests that all listed authors meet authorship criteria and that no others  
467 meeting the criteria have been omitted.

468 Preliminary results of this study were presented as a poster: E.Litkowski, et al., Evidence of causality  
469 between type 2 diabetes and dementia in the Million Veteran Program; Abstract/Program 3896.  
470 Presented at the 71st Annual Meeting of The American Society of Human Genetics, October 18, 2021,  
471 Virtual.

472 Funding: EML is supported by US National Institutes of Health award P30DK116073, and by funds from  
473 the Boettcher Foundation's Webb-Waring Biomedical Research Program. Phenotype development in  
474 MVP was supported by US Department of Veterans Affairs award BLR&D 1 I01BX004192 (MWL PI). LSP is  
475 supported in part by VA awards CSP #2008, I01 CX001899, I01 CX001737, and I01 BX005831; NIH awards  
476 R01 DK127083, R03 AI133172, R21 AI156161, U01 DK098246, UL1 TR002378; and a Cystic Fibrosis  
477 Foundation award PHILL12A0. RLH is supported by the Million Veteran Program MVP022 award # I01  
478 CX001727, VISN-22 VA Center of Excellence for Stress and Mental Health (CESAMH), and National  
479 Institute of Aging RO1 grants AG050595 (*The VETSA Longitudinal Twin Study of Cognition and Aging*  
480 *VETSA 4*), AG05064 (*Effects of Androgen Deprivation Therapy on Preclinical Symptoms of Alzheimer's*  
481 *Disease*), and AG065385 (*Novel Antagonists of the N-terminal Domain of the CRF Receptor Type 1 for*  
482 *Alzheimer's Disease*). SR is supported by US Department of Veterans Affairs award IK2-CX001907, by US  
483 National Institutes of Health award P30DK116073, and by funds from the Boettcher Foundation's Webb-  
484 Waring Biomedical Research Program. This research is based on data from the Million Veteran Program,  
485 Office of Research and Development, Veterans Health Administration, and was supported by awards  
486 MVP003, MVP009, MVP015, and MVP022. This publication does not represent the views of the  
487 Department of Veteran Affairs or the United States Government.

488 Conflicts of Interest: Within the past several years LSP has served on Scientific Advisory Boards for  
489 Janssen, and the Profil Institute for Clinical Research, and has or had research support from Merck,  
490 Amylin, Eli Lilly, Novo Nordisk, Sanofi, PhaseBio, Roche, Abbvie, Vascular Pharmaceuticals, Janssen,  
491 Glaxo SmithKline, Pfizer, and the Cystic Fibrosis Foundation. In the past, LSP was a speaker for Novartis  
492 and Merck, but not for the last five years. LSP is also a cofounder and Officer and Board member and  
493 stockholder of a company, DIASYST, Inc., which is developing software aimed to help improve diabetes  
494 management. SR has previously received research grant funding from the American Heart Association.  
495 EML, MWL, RZ, BRC, EML(2), JEH, JAL, MV, LAL, RLH have no conflicts to disclose.

496 **Consent Statement**

497 MVP participants went through a counseling process before they enrolled and provided consent to have  
498 their electronic health records reviewed. The VA Central Institutional Review Board gave approval for  
499 the study protocol in accordance with the principles of the Declaration of Helsinki.

500

501 **Key Words:** Type 2 Diabetes, Vascular Dementia, Alzheimer’s Disease, Genetics, Mendelian  
502 Randomization, Instrumental Variable, All-cause dementia

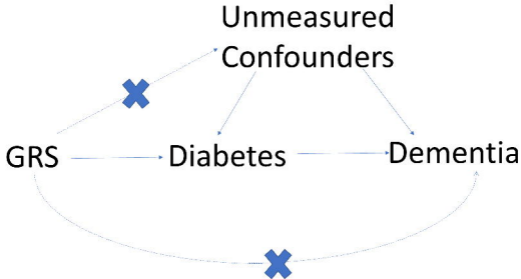

### EUR Population

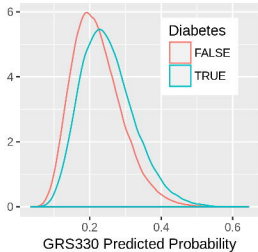

### AFR Population

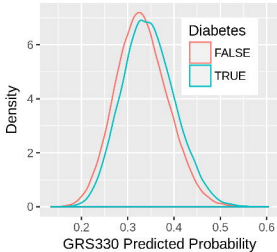

### HIS Population

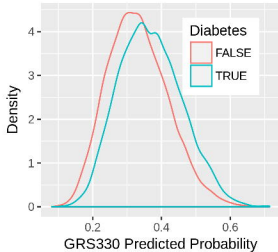

## a) EUR Population: Odds of Dementia with GRS Quartiles

### Diagnosis

OR [95% CI], p-value

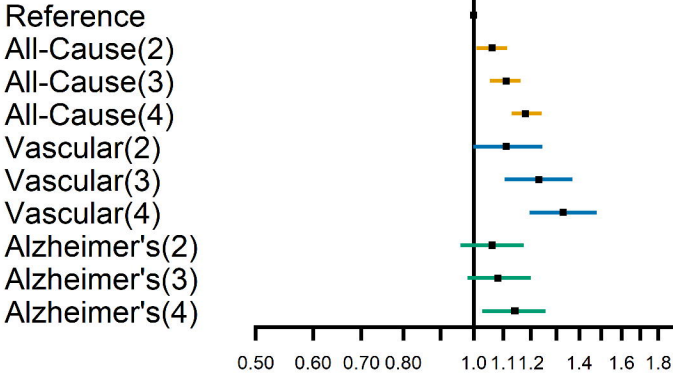

| Diagnosis      | OR [95% CI]       | p-value  |
|----------------|-------------------|----------|
| Reference      | NA                | NA       |
| All-Cause(2)   | 1.06 [1.02, 1.11] | 6.98e-03 |
| All-Cause(3)   | 1.11 [1.06, 1.15] | 3.15e-06 |
| All-Cause(4)   | 1.18 [1.14, 1.24] | 3.82e-15 |
| Vascular(2)    | 1.11 [1.01, 1.24] | 3.96e-02 |
| Vascular(3)    | 1.23 [1.11, 1.36] | 7.31e-05 |
| Vascular(4)    | 1.33 [1.20, 1.47] | 3.08e-08 |
| Alzheimer's(2) | 1.06 [0.96, 1.17] | 2.28e-01 |
| Alzheimer's(3) | 1.08 [0.99, 1.19] | 9.58e-02 |
| Alzheimer's(4) | 1.14 [1.03, 1.25] | 8.13e-03 |

## b) AFR Population: Odds of Dementia with GRS Quartiles

### Diagnosis

OR [95% CI], p-value

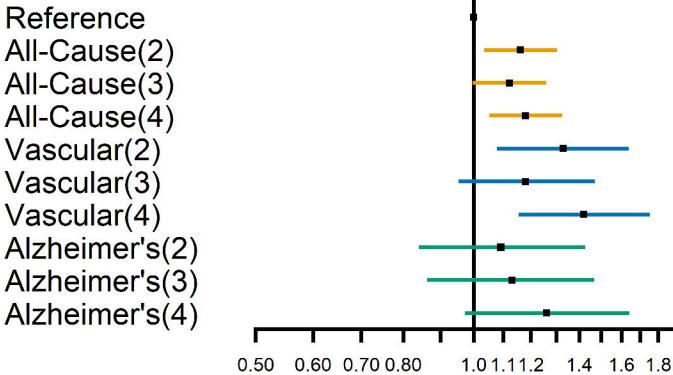

| Diagnosis      | OR [95% CI]       | p-value  |
|----------------|-------------------|----------|
| Reference      | NA                | NA       |
| All-Cause(2)   | 1.16 [1.04, 1.30] | 7.95e-03 |
| All-Cause(3)   | 1.12 [1.00, 1.25] | 4.47e-02 |
| All-Cause(4)   | 1.18 [1.06, 1.32] | 3.33e-03 |
| Vascular(2)    | 1.33 [1.08, 1.63] | 6.41e-03 |
| Vascular(3)    | 1.18 [0.96, 1.46] | 1.15e-01 |
| Vascular(4)    | 1.42 [1.16, 1.74] | 6.63e-04 |
| Alzheimer's(2) | 1.09 [0.85, 1.42] | 4.92e-01 |
| Alzheimer's(3) | 1.13 [0.87, 1.46] | 3.73e-01 |
| Alzheimer's(4) | 1.26 [0.98, 1.63] | 7.29e-02 |

## c) HIS Population: Odds of Dementia with GRS Quartiles

### Diagnosis

OR [95% CI], p-value

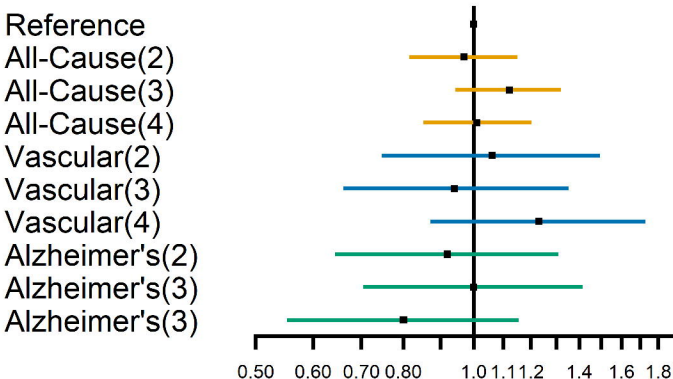

| Diagnosis      | OR [95% CI]       | p-value  |
|----------------|-------------------|----------|
| Reference      | NA                | NA       |
| All-Cause(2)   | 0.97 [0.82, 1.14] | 6.96e-01 |
| All-Cause(3)   | 1.12 [0.95, 1.31] | 1.82e-01 |
| All-Cause(4)   | 1.01 [0.86, 1.19] | 8.84e-01 |
| Vascular(2)    | 1.06 [0.75, 1.49] | 7.52e-01 |
| Vascular(3)    | 0.94 [0.66, 1.34] | 7.52e-01 |
| Vascular(4)    | 1.23 [0.88, 1.72] | 2.33e-01 |
| Alzheimer's(2) | 0.92 [0.65, 1.30] | 6.30e-01 |
| Alzheimer's(3) | 1.00 [0.71, 1.40] | 9.86e-01 |
| Alzheimer's(3) | 0.80 [0.56, 1.15] | 2.24e-01 |

**a) EUR**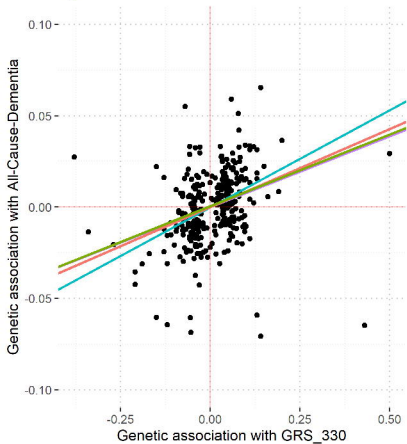**b) AFR**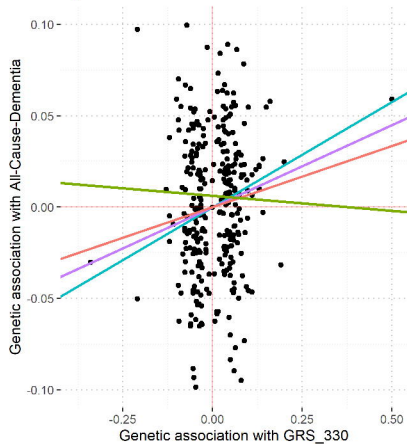**c) HIS**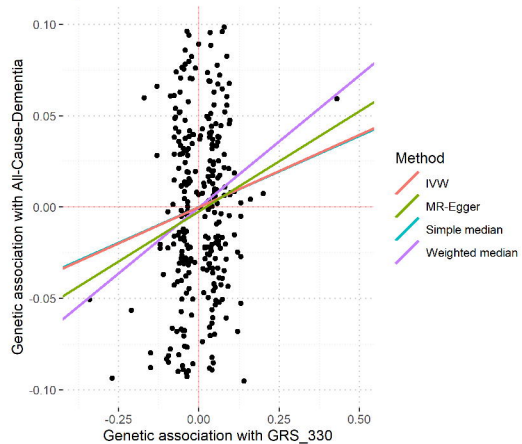

Source: https://www.medrxiv.org/content/10.1101/2023.03.07.23286526v1.full.pdf
